# Supplementary material for: Túneles de Pajares: Galería de acceso de Folledo
Source: Royal Society of Chemistry journal article supplement (doi:10.1039/d3ra00043e), 2007-01-01
Supplement: d3ra00043e1.pdf [file d3ra00043e1.pdf]

## Supporting information

### Interfacial S–O bonds specifically boost Z-scheme charge separation in CuInS<sub>2</sub>/In<sub>2</sub>O<sub>3</sub> heterojunction for efficient photocatalytic activity

Xiaofei Fu<sup>1,\*</sup>, Junwu Tao<sup>1</sup>, Zizhou Zhao<sup>1</sup>, Siwen Sun<sup>1</sup>, Lin Zhao<sup>1</sup>, Zuming He<sup>2</sup>, Yong Gao<sup>1</sup> and Yongmei Xia<sup>3</sup>

<sup>1</sup> School of Resources and Environmental Engineering, Jiangsu University of Technology, Changzhou 213001, China

<sup>2</sup> School of Microelectronics and Control Engineering, Changzhou University, Changzhou 213164, China

<sup>3</sup> School of Materials and Engineering, Jiangsu University of Technology, Changzhou 213001, China

\* Corresponding author: Xiaofei Fu; fuxiaofei@jsut.edu.cn

#### Supplementary Material 1 (SM1)

##### Sample characterization

The crystal structure and phases of the as-prepared materials were performed on X-ray diffraction (XRD, Shimadzu-3A) with Cu K $\alpha$  radiation at 0.15418 nm. Scanning electron microscopy (SEM) images were characterized by Hitachi 4800. The details of the morphology were further observed by transmission electron microscope (TEM) and high-resolution TEM (FEI Tecnai G2 F20) with an accelerating voltage of 200 kV. Fourier Transform Infrared (FT-IR) spectra were observed on a Tensor 27 spectrometer (Bruker, Germany). Elemental compositions were measured with a X-ray photoelectron spectrometer (XPS, ULVAC-PHI 5000, Japan) operated at 12.5 kV and 16 mA with the Al K $\alpha$  irradiation as exciting source (1486.6 eV). The UV-vis diffuse reflectance spectra were measured on a Shimadzu UV-3600 spectrophotometer using BaSO<sub>4</sub> as a reference. The photoluminescence (PL) spectra of samples were obtained from an F-4600 spectrophotometer (Hitachi) with a laser excitation at 320 nm. The photocurrent and Mott-schottky curves were measured on an electrochemical station (CHI660D, Chenhua Instruments, China) in the standard three-electrode system. Electron spin resonance (ESR) signals of the active radicals were performed on a Bruker model ESR JES-FA200 spectrometer with 5,5-dimethyl-1-pyrroline N-oxide (DMPO) as the spin-trapping agent to detect  $\bullet\text{O}_2^-$  and  $\bullet\text{OH}$ .

##### Computational details

Density functional theory (DFT) calculations were carried out using the Vienna ab initio Simulation Package (VASP) on a plane-wave code with projector augmented wave potential (PAW). The generalized gradient approximation (GGA) of Perdew-Burke-Ernzerhof (PBE) described the exchange-correlation interactions. The lattice parameters and atomic coordinates were relaxed using the cutoff energy of 450 eV and Monkhorst-pack grids of  $7 \times 7 \times 1$  and  $5 \times 5 \times 1$  k-points for  $\text{CuInS}_2$  and  $\text{In}_2\text{O}_3$ , respectively. All structures were fully relaxed until the maximum force at each atom was less than  $0.01 \text{ eV/\AA}$ .

## SM2

**Table S1**

Comparison of the photocatalytic performance of  $\text{CuInS}_2/\text{In}_2\text{O}_3$  with those of previously reported photocatalysts

| Material                                                       | Light source  | Catalyst concentration | Pollutant concentration                           | Catalyst performance/<br>irradiation time | Refs.     |
|----------------------------------------------------------------|---------------|------------------------|---------------------------------------------------|-------------------------------------------|-----------|
| $\text{CdS}/\text{CuInS}_2$                                    | 300 W Xe lamp | 30 mg in 150 mL        | Cr(VI)<br>(10 mg/L)                               | 98% in 60 min                             | [1]       |
| $\text{ZnFe}_2\text{O}_4/\text{BiVO}_4/\text{g-C}_3\text{N}_4$ | 300 W Xe lamp | 150 mg in 300 mL       | lomefloxacin<br>(25 mg/L)                         | 96% in 105 min                            | [2]       |
| $\text{MgTiO}_3$                                               | 30 W LED      | 30 mg in 75 mL         | lomefloxacin<br>(10 mg/L)                         | 83% in 150 min                            | [3]       |
| $\text{In}_2\text{O}_3/\text{BiOBr}$                           | 300 W Xe lamp | 100 mg in 200 mL       | Cr(VI)<br>(10 mg/L)                               | 56% in 30 min                             | [4]       |
| $\text{Cu}_2\text{WS}_4$                                       | 20 W LED      | 20 mg in 50 mL         | lomefloxacin<br>(20 mg/L)                         | 60% in 120 min                            | [5]       |
| $\text{TiO}_2/\text{AC-AEMP}$                                  | 300 W UV lamp | 250 mg in 500 mL       | Cr(VI)<br>(40 mg/L)                               | 93% in 180 min                            | [6]       |
| $\text{CuInS}_2/\text{In}_2\text{O}_3$                         | 350 W Xe lamp | 200 mg in 500 mL       | lomefloxacin<br>(30 mg/L),<br>Cr(VI)<br>(50 mg/L) | 99% in 90 min,<br>98% in 90 min           | This work |

1 F. Deng, X. Lu, Y. Luo, J. Wang, W. Che, R. Yang, X. Luo, S. Luo, and D. D. Dionysiou, *Chem. Eng. J.*, 2019, **361**, 1451–1461.

2 H. B. Truong, B. T. Huy, S. K. Ray, G. Gyawali, Y. I. Lee, J. Cho, and J. Hur, *Chemosphere*, 2022, **299**, 134320.

3 Y. Sneha, S. R. Yashas, T. Thinley, S. Prabagar Jijoe, and H. Puttaiah Shivaraju, *Environ. Sci. Pollut. Res.*, 2022, **29**, 67969–67980.

4 T. Xian, H. Li, X. Sun, Y. Huo, L. Di, C. Sun, and H. Yang, *ACS Appl. Nano Mater.*, 2022, **5**, 15260–15271.

5 S. M. Abhishek, N. K. Swamy, S. R. Yashas, H. P. Shivaraju, and N. A. Chamaraja, *J. Mater. Sci. Mater. Electron.*, 2022, **33**, 12359–12370.

6 Z. Gao, H. Yang, X. Fu, Q. Jin, Q. Wu, L. Kang, and J. Wu, *Environ. Sci. Pollut. Res.*, 2020, **27**, 17446–17457.

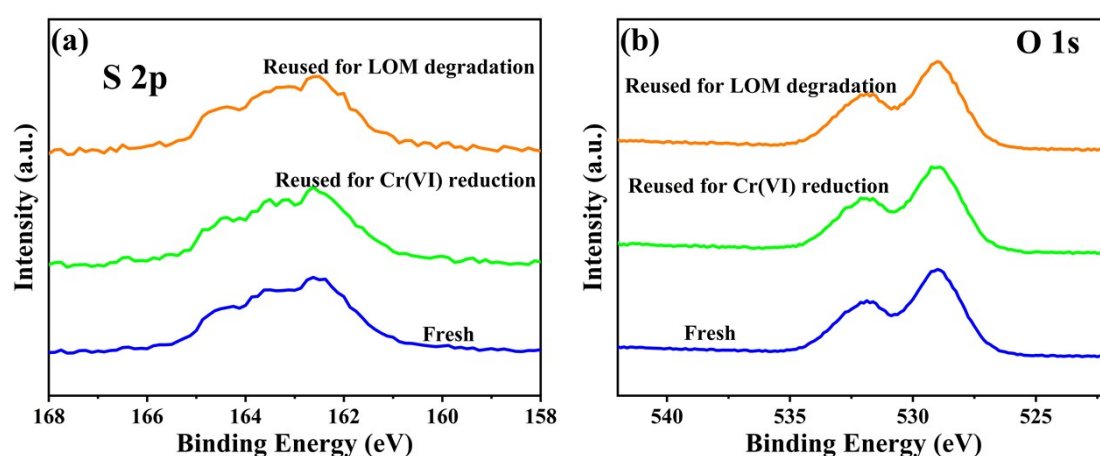

Fig. S1 High-resolution XPS spectra of (a) S 2p and (b) O 1s on the fresh and used 17-CuInS<sub>2</sub>/In<sub>2</sub>O<sub>3</sub>.

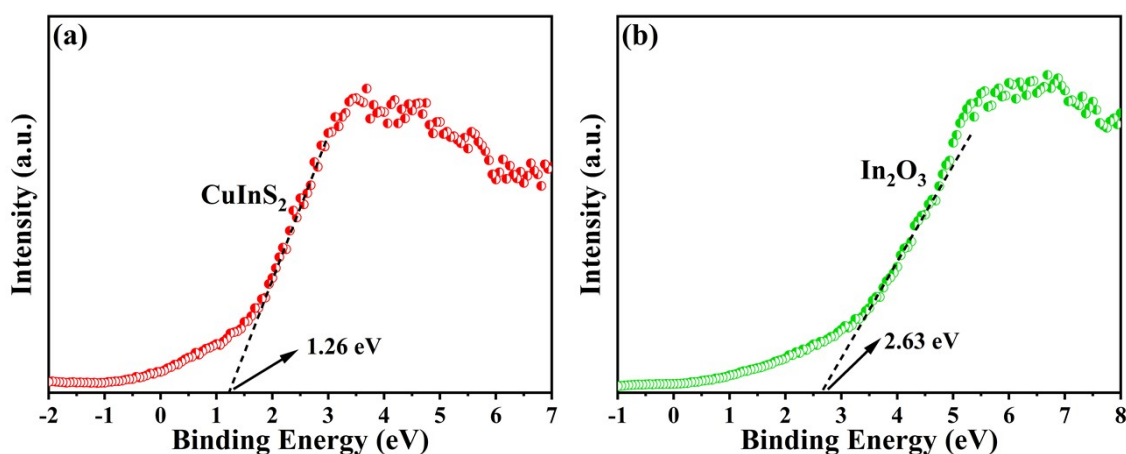

Fig. S2 XPS valence band spectra of CuInS<sub>2</sub> (a) and In<sub>2</sub>O<sub>3</sub> (b).

Fig. S2 shows the XPS valence band (VB) spectra on the bare CuInS<sub>2</sub> and In<sub>2</sub>O<sub>3</sub>. The tangent extrapolation method was used to determine the VB position, and the VB values of CuInS<sub>2</sub> and In<sub>2</sub>O<sub>3</sub> were obtained at 1.26 and 2.63 eV, respectively.
